# Supplementary material for: Growing Macrophages Regulate High Rates of Solute Flux by Pinocytosis
Source: PubMed Central journal article supplement (PMC11526976; doi:10.1101/2024.10.22.619691), 2024-10-22
Supplement: NIHPP2024.10.22.619691V1-supplement-1.pdf [file NIHPP2024.10.22.619691V1-supplement-1.pdf]

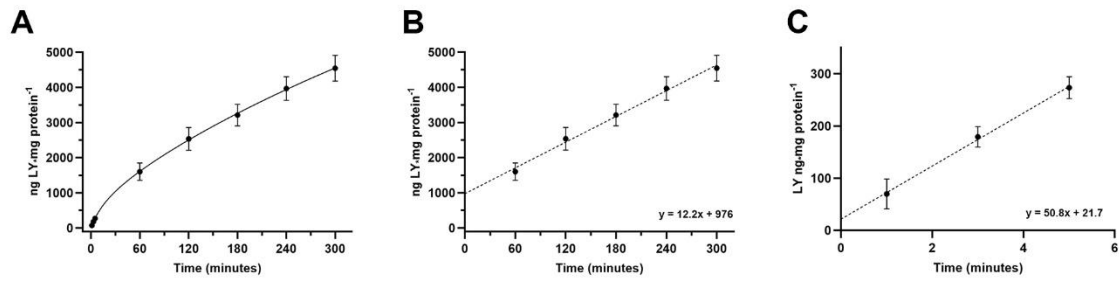

## Supplementary Figure 1

**Supplementary Figure 1.** The data of Figure 1 B-D plotted as ng LY·mg protein<sup>-1</sup>, as in previous publications (Berthiaume et al., 1995; Swanson et al., 1985).

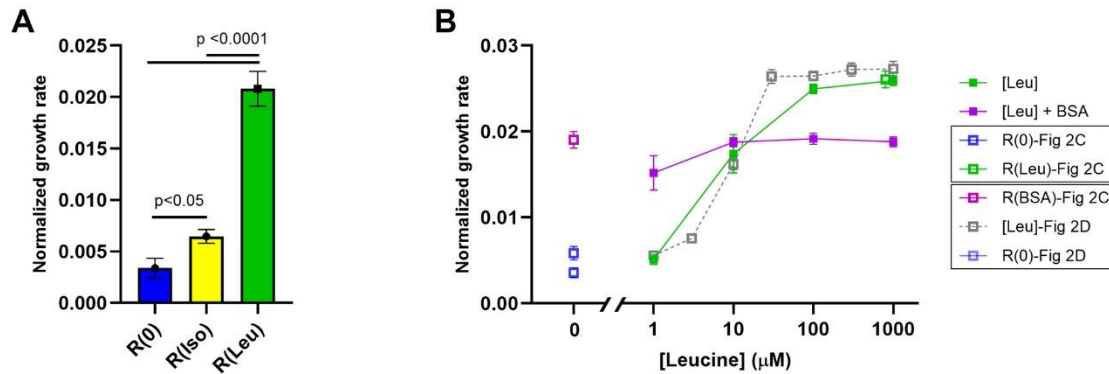

## Supplemental Figure 2

**Supplementary Figure 2.** (A) Rates of cell growth in R(0)/CSF1, R(Iso)/CSF1, R(Leu)/CSF1, showing mean and SEM for rates of growth normalized to the cell counts for each condition at 30 hrs. One-way ANOVA,  $n = 81$  per condition (9 time points from 30-38 hrs, 3 wells per time point, 3 biological replicates).

(B) Compiled data from related experiments that measured rates of cell growth in various media, normalized to the 30-hour time point. Solid squares indicate data of Fig. 2E. Open squares indicate data of Fig. 2C and Fig 2D.

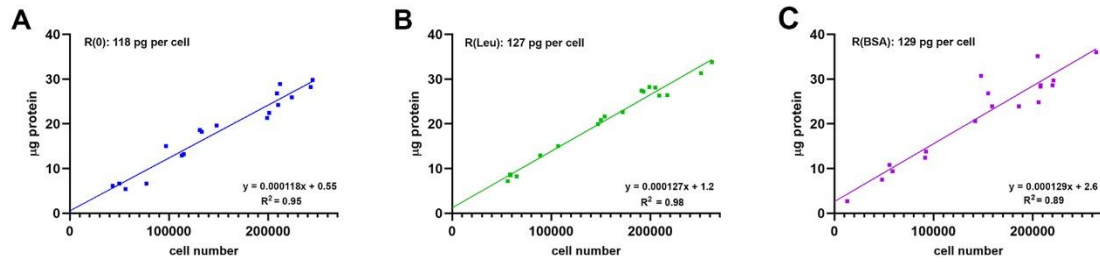

### Supplemental Figure 3

**Supplementary Figure 3.** Plots of  $\mu\text{g protein}\cdot\text{well}^{-1}$  vs. cell numbers obtained from the Incucyte allow determination of protein content per cell in the various growth media. (A) R(0), (B) R(Leu), (C) R(BSA).

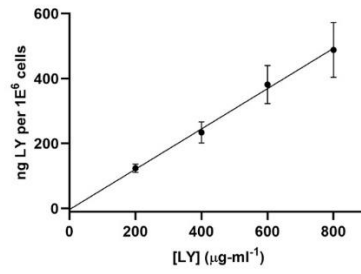

### Supplemental Figure 4

**Supplementary Figure 4.** The data of Fig. 4A recalculated to show ng LY·10<sup>6</sup> cells<sup>-1</sup>.

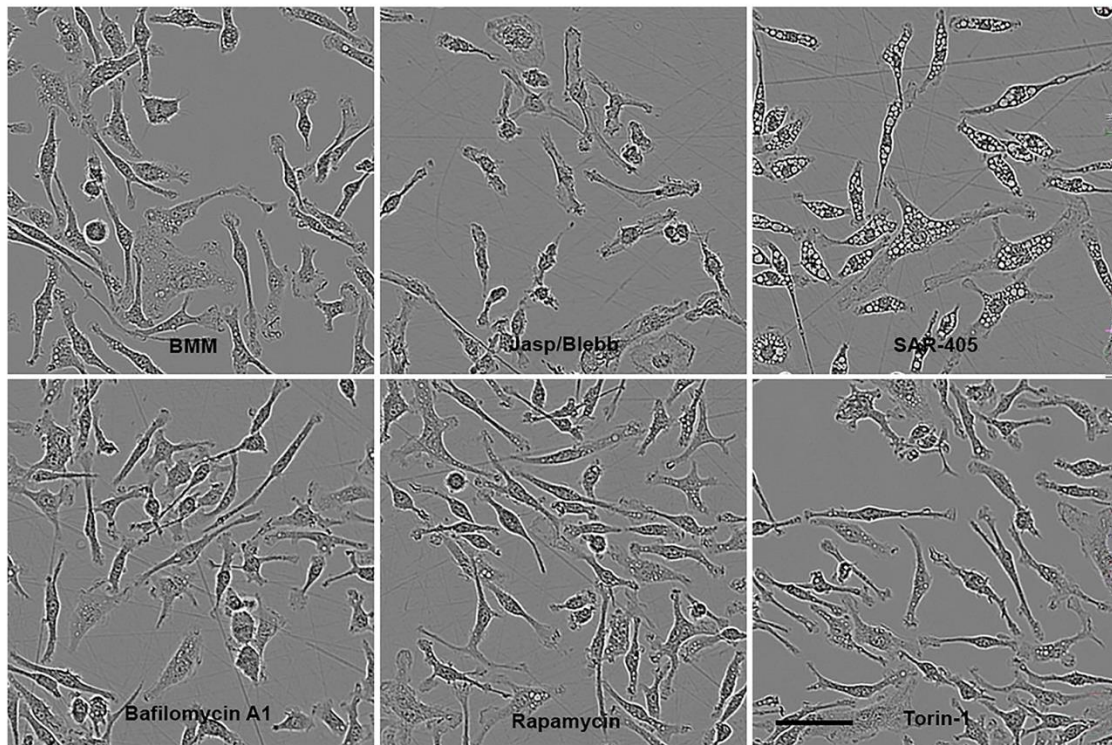

## Supplemental Figure 5

**Supplementary Figure 5.** Effects of inhibitors on macrophage morphology obtained from incucyte images taken 3 hr after addition of BMM (control), J/B, SAR-405, Bafilomycin A1, Rapamycin and Torin-1. Scale bar: 50  $\mu$ m.

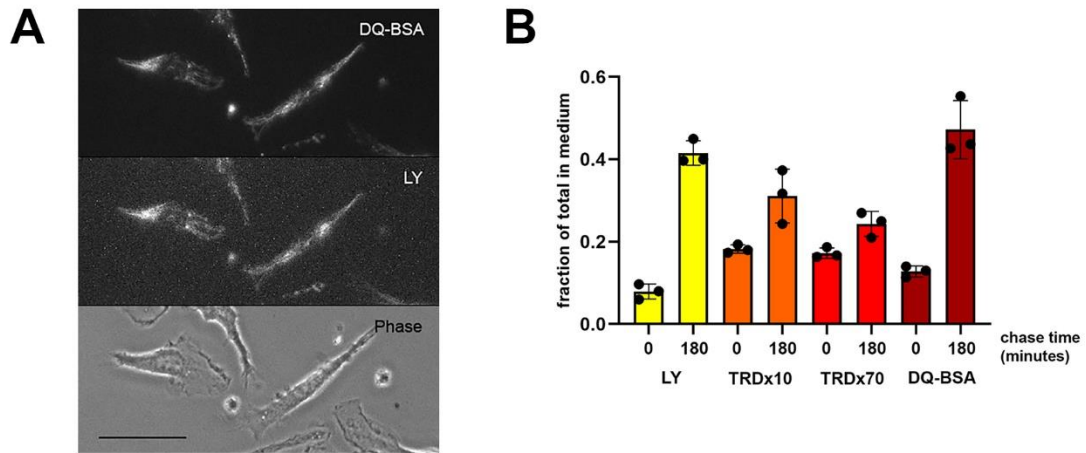

## Supplementary Figure 6

**Supplementary Figure 6.** (A) Microscopy of macrophages labeled for 2 hrs with 10  $\mu\text{g/ml}$  DQ-BSA and 500  $\mu\text{g/ml}$  LY in BMM, washed and imaged in RB. Scale bar: 20  $\mu\text{m}$ .

(B) Related to the experiments of Fig. 6A, B, showing the fraction of the total fluorescence in each well that was in the medium (vs. cell-associated). The 0-minute chase data were subtracted from the 180-minute chase data to obtain the values in Fig. 6B.
